# Supplementary material for: Use of smartphones to aid the teaching of equine ocular fundus examination
Source: HighWire-hosted journal article supplement (doi:10.1136/vr.105544), 2020-03-13
Supplement: vetrec-2019-105544supp001_data_supplement.pdf [file vetrec-2019-105544supp001_data_supplement.pdf]

1  
2  
3  
4  
5  
6  
7  
8  
9  
10  
11  
12  
13  
14  
15  
16  
17  
18  
19  
20  
21  
22  
23  
24  
25  
26  
27  
28  
29  
30  
31  
32  
33  
34  
35  
36  
37  
38  
39  
40  
41  
42  
43  
44  
45  
46  
47  
48  
49  
50  
51  
52  
53  
54  
55  
56  
57  
58  
59  
60

Q1. How confident did you feel about performing and ophthalmic examination in the horse before the practical?

---

No confidence

Max confidence

Q2. How useful did you find the traditional teaching of the ophthalmic examination using a portable ophthalmoscope alone?

---

Not useful

Max useful

Q3. How useful did you find teaching of the ophthalmic examination using a smartphone?

---

Not useful

Max useful

Q4. How confident did you feel about performing and ophthalmic examination in the horse after the practical?

---

No confidence

Max Confidence

Further comments:

---

---

---

---

---

---

---

---

---

---
